## RESEARCH ARTICLE

# Abundance, density, and social structure of African forest elephants (*Loxodonta cyclotis*) in a human-modified landscape in southwestern Gabon

Colin M. Brand<sup>1</sup> , Mireille B. Johnson<sup>2</sup> , Lillian D. Parker<sup>3,4</sup> , Jesús E. Maldonado<sup>3,4</sup> , Lisa Korte<sup>2</sup>, Hadrien Vanthomme<sup>5</sup>, Alfonso Alonso<sup>5</sup>, Maria Jose Ruiz-Lopez<sup>6</sup>, Caitlin P. Wells<sup>7,8</sup> , Nelson Ting<sup>1,8\*</sup>

**1** Department of Anthropology, University of Oregon, Eugene, OR, United States of America, **2** Gabon Biodiversity Program, Smithsonian Conservation Biology Institute, Gamba, Gabon, **3** Department of Biosciences, School of Systems Biology, George Mason University, Fairfax, VA, United States of America, **4** Center for Conservation Genomics, Smithsonian Conservation Biology Institute, National Zoological Park, Washington, DC, United States of America, **5** Center for Conservation and Sustainability, Smithsonian Conservation Biology Institute, National Zoological Park, Washington, DC, United States of America, **6** Estacion Biológica de Doñana, Seville, Spain, **7** Department of Fish, Wildlife, and Conservation Biology, Colorado State University, Fort Collins, CO, United States of America, **8** Institute of Ecology and Evolution, University of Oregon, Eugene, OR, United States of America

 These authors contributed equally to this work.

\* [nting@uoregon.edu](mailto:nting@uoregon.edu)

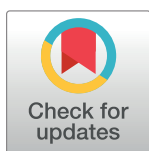

## OPEN ACCESS

**Citation:** Brand CM, Johnson MB, Parker LD, Maldonado JE, Korte L, Vanthomme H, et al. (2020) Abundance, density, and social structure of African forest elephants (*Loxodonta cyclotis*) in a human-modified landscape in southwestern Gabon. PLoS ONE 15(4): e0231832. <https://doi.org/10.1371/journal.pone.0231832>

**Editor:** Johan R. Michaux, Universite de Liege, BELGIUM

**Received:** December 20, 2019

**Accepted:** April 1, 2020

**Published:** April 29, 2020

**Copyright:** This is an open access article, free of all copyright, and may be freely reproduced, distributed, transmitted, modified, built upon, or otherwise used by anyone for any lawful purpose. The work is made available under the [Creative Commons CC0](https://creativecommons.org/licenses/by/4.0/) public domain dedication.

**Data Availability Statement:** STR data are within Supporting Information files mtDNA sequence data are in the NCBI Genbank database (accession numbers MT106333 - MT106615)

**Funding:** Funding was provided by the Gabon-Oregon Center to NT, Shell Gabon to the Smithsonian Conservation Biology Institute, and the National Zoo Center for Conservation Genomics. The funders had no role in study

## Abstract

Population monitoring is critical to effective conservation, but forest living taxa can be difficult to directly observe. This has been true of African forest elephants (*Loxodonta cyclotis*), for which we have limited information regarding population size and social behavior despite their threatened conservation status. In this study, we estimated demographic parameters using genetic capture-recapture of forest elephants in the southern Industrial Corridor of the Gamba Complex of Protected Areas in southwestern Gabon, which is considered a global stronghold for forest elephants. Additionally, we examined social networks, predicting that we would find matrilineal structure seen in both savanna and forest elephants. Given 95% confidence intervals, we estimate population size in the sampled area to be between 754 and 1,502 individuals and our best density estimate ranges from 0.47 to 0.80 elephants per km<sup>2</sup>. When extrapolated across the entire Industrial Corridor, this estimate suggests an elephant population size of 3,033 to 6,043 based on abundance or 1,684 to 2,832 based on density, approximately 40–80% smaller than previously suggested. Our social network analysis revealed approximately half of network components included females with different mitochondrial haplotypes suggesting a wider range of variation in forest elephant sociality than previously thought. This study emphasizes the threatened status of forest elephants and demonstrates the need to further refine baseline estimates of population size and knowledge on social behavior in this taxon, both of which will aid in determining how population dynamics in this keystone species may be changing through time in relation to increasing conservation threats.

design, data collection and analysis, decision to publish, or preparation of the manuscript.

**Competing interests:** The authors have declared that no competing interests exist.

## Introduction

Compared to African savanna elephants, the biology and behavior of African forest elephants (*Loxodonta cyclotis*) remain poorly understood. This knowledge gap may be attributed to their disputed status as a distinct species from *L. africana* [1], their cryptic nature, and occupation of difficult to access habitat. Indeed, this last factor limits most behavioral observations of this species to time spent in bais (i.e. forest clearings around a water resource) [2–4], although observations have been possible when the elephants occupy coastal or savanna habitats [5–8]. Studies of African forest elephants are critical given their conservation status and recently documented population declines [9, 10], as well as their relevance for understanding the evolution of proboscideans [11, 12].

Whereas many studies have focused on the feeding ecology of this species [8, 13, 14], fewer have examined their social behavior. Early models of forest elephant sociality assumed similarities with African savanna elephants, which exhibit a fission-fusion social structure with subunits consisting largely of multiple related females while males are primarily independent and do not consistently associate with a particular subunit [15–17]. This social structure is multi-tiered with mother-calf pairs forming the simplest unit, families consisting of multiple mother-calf pairs, kinship groups being composed of multiple families, and clans consisting of multiple kinship groups [18]. Direct observation of forest elephants has revealed that social groups are considerably smaller than those of African savanna elephants with groups typically composed of two to three individuals, often mothers and their dependent offspring [5, 19]. Genetic studies have confirmed that individuals in these small groups are usually highly related [7, 20, 21]. Studies of forest elephants in bais have also revealed that while forest elephant groups differ in size compared to savanna elephant groups, both species exhibit fission-fusion social structure [2, 7]. Collectively, these data have furthered our understanding of forest elephant sociality; however, many of these studies have relied on observations of forest elephants in bais. Further study of forest elephants outside of bais are of great importance, especially considering that behavior may differ between bais and other habitats.

Many studies of forest elephants have been conducted in national parks or other protected areas [7, 20–22]. However, forest elephants, like many other species, are experiencing increasing contact with humans outside of protected areas as a result of agricultural expansion, resource extraction, and increased urbanization occurring across sub-Saharan Africa and elsewhere. Assessing the potential effects of anthropogenic activity on wildlife biology and behavior by studying forest elephant populations in human-dominated landscapes is now a key research priority [23–25].

Forest elephant populations have been dramatically decreasing over the past few decades for a number of reasons including habitat loss and poaching [9, 26]. One recent study highlighted major population loss (78–81%) over a decade within a protected area in north-eastern Gabon [10]. The authors argued that the primary reason for this decline is attributed to poaching. Collectively, these studies highlight the immediate need not only for measures to protect forest elephants but also for assessing baseline levels and changes in population size, density, and social structure. While genetic studies can be less cost effective than other methods, noninvasive sampling provides more accurate and precise estimates than other traditional census methods [27, 28]. Such census methods (e.g., counting dung piles) have provided initial global estimates of ~100 000 remaining forest elephants [29], with Gabon identified as containing a considerable proportion of individuals. In particular, the Gamba Complex of Protected Areas in southwestern Gabon, which consists of two national parks (Loango and Moukalaba-Doudou) and an intervening Industrial Corridor, has been described as a bastion for forest elephants. It was previously thought that the forest elephant population in the entire complex

ranged from 10,236 to 12,174 in 1999 [30]. A more recent study [31] speculated that the Industrial Corridor of the Gamba Complex contained approximately 10,000 forest elephants in 2004, which would have been approximately one-tenth of the world's remaining forest elephant population at that time [9]. In addition to information about estimated population size, this study reported that the corridor has a resident forest elephant population and also serves as additional habitat to elephants whose primary ranges are in the neighboring parks [31]. Elephants in the Industrial Corridor were also found to occur in small, matrilineal groups [20] and exhibit lower fecal glucocorticoid concentrations than elephants inhabiting neighboring Loango National Park [32].

The present study has two research questions. 1) How many forest elephants occupy the 891 km<sup>2</sup> area surrounding the town of Gamba in the Industrial Corridor? Based on the previous population size estimate for the entire Industrial Corridor, we optimistically predicted that our study area would contain approximately 3,330 forest elephants assuming relatively homogeneous densities across the landscape and a stable population size since 2004 [31]. We used genetic capture-recapture to estimate the abundance and density of elephants within our study area, and we also extrapolated these estimates to infer the total elephant population size across the Gamba Complex Industrial Corridor. 2) What is the social structure of these forest elephants? The social structure of African savanna elephants clusters around matrilineal systems with a multi-tiered system [15, 17] and the limited amount of data on forest elephants appears to suggest this is also true for this taxon [2, 7, 20]. We predicted that social network analysis and genetic data would yield networks that are nearly exclusively composed of females with the same mitochondrial haplotype.

## Methods

### Ethics statement

This study was authorized by the Centre National de la Recherche Scientifique et Technologique (permits #AR0017/13/MENESTFPRSCJS/CENAREST/CG/CST/CSAR).

### Study area

The Gamba Complex of Protected Areas in southwestern Gabon (Fig 1) covers approximately 9,600 km<sup>2</sup> and includes two national parks (Loango National Park, 1,550 km<sup>2</sup>; Moukalaba-Doudou National Park, 4,500 km<sup>2</sup>) in addition to an intervening Industrial Corridor (3,585 km<sup>2</sup>), which holds oil and timber concessions [20, 31–33]. Our study was conducted within the Industrial Corridor in an 891 km<sup>2</sup> landscape between Sette Cama in the north and Mayonami in the south [25]. This landscape consists of a variety of habitats including grassland, primary forest, secondary forest, and wetlands. The study area also has the highest human population densities in the Gamba Complex, ranging from < 1 to > 60 people per km<sup>2</sup> [34], and features multiple plantations, settlements, and the town of Gamba with a population of > 9,000 people [25, 33]. The development of this town and the surrounding area is largely the result of oil extraction, which began in the 1960s [33, 34]. Further, this landscape includes the infrastructure necessary for oil extraction including buildings, wells, and roads [25]. Thus, much of the study area is dominated by human residence and/or activity.

### Sample collection and genotyping

Samples were collected non-invasively from fresh dung between June and August 2013 (during the dry season) and between October 2013 and March 2014 (the wet season). A sampling grid was constructed using ArcGIS, version 10.1 (ESRI, 2012), consisting of 100 points with 3 km

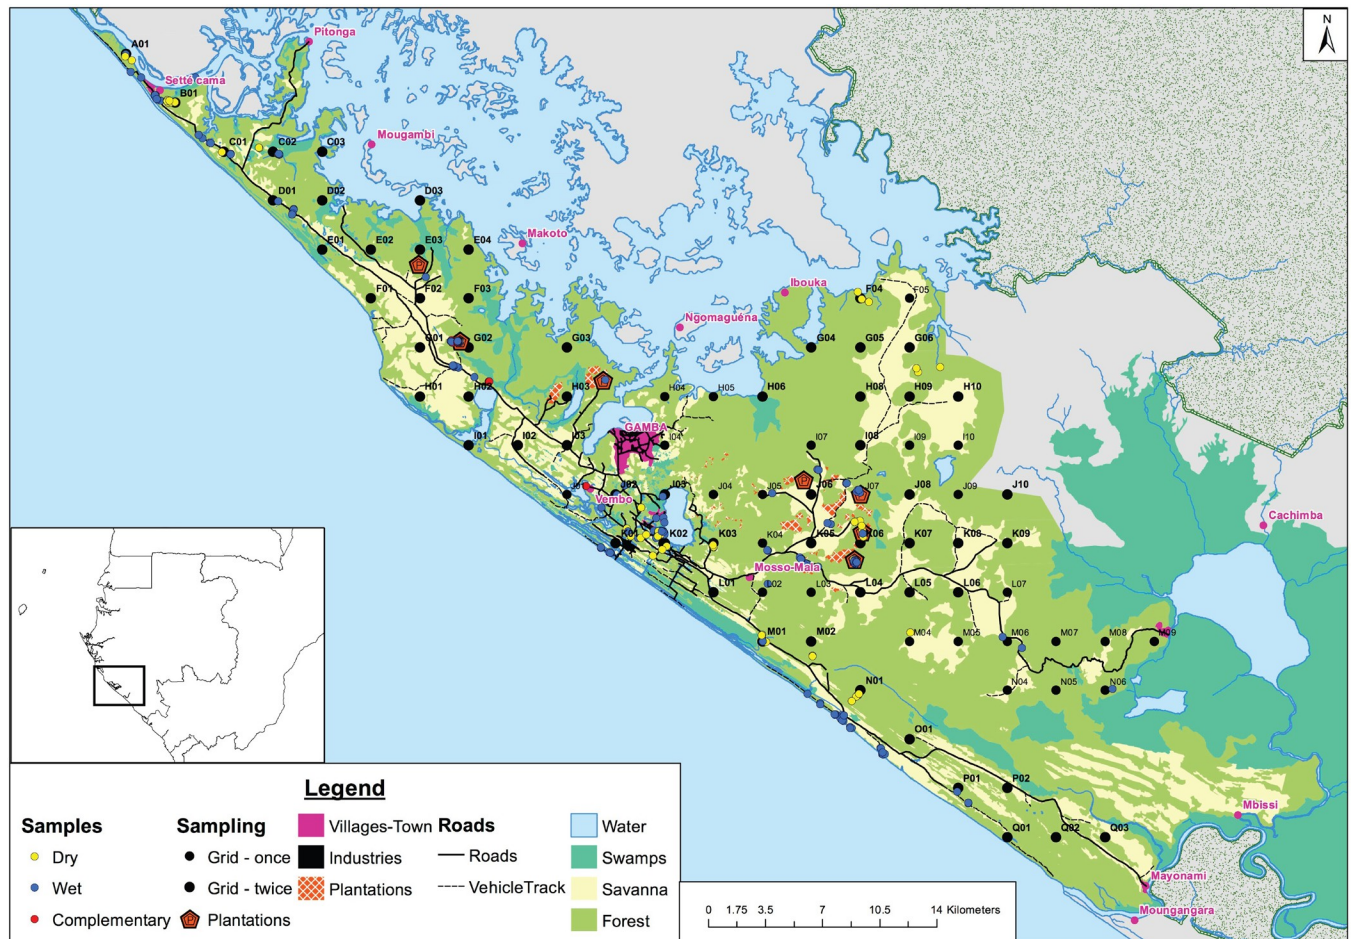

**Fig 1. Location of study area, sampling grid, and sample localities.**

<https://doi.org/10.1371/journal.pone.0231832.g001>

intervals that covered the research area (Fig 1). On sampling days, three to four points were chosen at random. A team of three people searched for fresh dung 500 m before the point and 500 m after reaching the point in the direction of any elephant trails. Fresh trails from the point were also followed for ~150 m.

Details on sample preservation and STR (short-tandem repeat) genotyping of dung samples are described elsewhere [25]. Briefly, for each sample, approximately 10 g of the external layer of dung was collected into a 50 mL polypropylene tube. The samples were temporarily boiled in compliance with US Department of Agriculture rules for legal importation into the United States. After boiling, the samples were dried using silica gel and shipped to the Smithsonian Conservation Biology Institute in Washington, DC. Total genomic DNA was extracted from each sample for genetic analyses. Samples were genotyped at eight dinucleotide microsatellite (STR) loci (S1 File) and sexed using two Y-specific loci (*SRY* and *AMELY*) and one X-specific locus (*PLP1*) in a multiplex PCR reaction following [35]. We also sequenced a 600 bp segment of the mtDNA control region for all samples using previously established primers that amplify mtDNA in this taxon, MDL3 and MDL5 [36].

GENALEX version 6.5 [37] was used to determine  $P(\text{ID})$ , the probability that two individuals randomly drawn from a population have the same multi-locus genotype, and  $P(\text{ID})_{\text{sib}}$ , the probability that siblings have the same multi-locus genotype, which corrects for shared alleles



among relatives and siblings. Thus, these measures test the power of a microsatellite panel to identify unique individuals [38]. As elephants are highly social and may be associating with kin, we chose the more conservative approach:  $P(\text{ID})_{\text{sib}}$ , using a cutoff of 0.01. We used GENEPOP version 4.2 [39] to test for deviations from Hardy-Weinberg equilibrium (HWE) and linkage disequilibrium (LD) across all markers. Fisher's exact test was used to test for a deviation from HWE across all loci. We used the program's Markov chain algorithm to determine departures from HWE and LD for each marker using 100 batches and 1000 iterations. Significance levels were adjusted using a Bonferroni correction. MICROCHECKER version 2.2.1 [40] was used to detect the presence of null alleles. We used GIMLET version 1.3.3 [41] to determine allelic dropout and false allele rates across all loci. GENALEX was used to identify unique individuals from the consensus genotypes, detect individual recapture, and estimate standard measures of genetic diversity. We considered samples with identical mtDNA haplotypes, sex, and STR genotypes to represent recapture of the same individual. We also allowed for samples to differ at one STR locus to represent recapture to account for genotyping error. STR genotypes are listed in [S2 File](#) and mtDNA haplotypes are available online (GenBank accession numbers MT106333—MT106615).

### Estimation of abundance and density

We used the package 'capwire' [42, 43] in R, version 3.5.2 [44] to estimate elephant abundance in our study area. Capwire generates abundance estimates from capture class frequency data. We classed individuals based on the number of times each unique individual was sampled. We considered samples to be recaptures if they were collected on different days (i.e., samples from the same individual collected on the same day at the same location were not considered separate capture events). Capwire features three models to estimate population size: the equal capture model (ECM), the two-innate rates model (TIRM), and the partitioned two-innate rates model (TIRMpart). ECM assumes that all individuals in a given population have an equal probability of being sampled, whereas the TIRM categorizes each individual into one of two classes: individuals that are less likely to be resampled and those that are more likely to be resampled [42]. TIRMpart partitions the data into three different classes and calculates population size using TIRM, but excludes individuals from the third class that were detected a large number of times [43]. These individuals violate the assumption of two detection probabilities and may bias the population size estimate, and they thus are excluded. The number of individuals sampled in this third class are added to the point estimate calculated from the two classes for the final partitioned point estimate [43]. When generating point estimates we used a maximum population of 10,000 individuals. In addition to the point estimates from both models, we calculated 95% confidence intervals for each using parametric bootstrapping ( $N = 100$  bootstraps). We emphasize these confidence intervals, rather than the point estimates, as they are more informative for size estimation and monitoring trends over time [45]. All three models assume the target population is closed (e.g. no births, no deaths, no emigration/immigration). We also compared the ECM and TIRM as well as TIRM to TIRMpart using likelihood ratio tests with 100 bootstraps to determine which model best fit our data.

We also examined forest elephant density using the spatially explicit R package 'secur' [46, 47]. This program estimates density by assuming the population is closed, each individual sampled has a circular home range, and that capture probability decreases with increasing distance from the fixed center of that individual's home range. We used an exponential detection function, the default Poisson distribution of home range centers, and a buffer of 2000 m, which defines an area outside of the sampling area in which individuals may have a home range center. As some samples were collected near bodies of water (the Atlantic Ocean or the

Ndogo Lagoon), we used a 2000 m buffer so as to not include home range centers in unsuitable habitat. This choice in buffer distance is further buttressed by known forest elephant home ranges from radio-collared individuals whose mean home range radii (as estimated by minimum convex polygons) is  $\sim 8.5$  km [48]. We ran two models, a null model as well as a model that examined sex differences in detection. Forest elephant sex ratios are typically female biased [2, 19]; thus, we modeled for this potential influencing factor in density estimation. While most samples yielded consistent genotypes at the three sex-determining loci, we classified the sex for any samples that did not consistently amplify as unknown. We compared these models using Akaike's Information Criteria corrected for small sample size (AICc) and determined the best fit model using  $\Delta\text{AICc} < 2$  [49].

## Sociality analysis

We used fresh dung samples collected in close proximity to assess patterns of sociality. We excluded any samples that appeared to be of a different age based on appearance (moisture, degradation, etc.) than the surrounding samples ( $N = 4$ ). Previous forest elephant studies have used varying distances to define association. A distance of 100 m has been previously used [20] whereas others have used 250 m [7, 21]. The latter was described by the authors to be a compromise between 50 m used in [5] for forest elephants and 500 m used for savanna elephants in [18]. As there is no consensus on the appropriate distance to define association in elephants and given that the distance used to define association will determine the subsequent social network, we constructed social networks using both 100 and 250 m as defining association. We also constructed a social network using 75 m to assess how different this social network would be compared to the 100 m and 250 m networks. Distances between samples were calculated in ArcMap, version 10.4 (ESRI 2015). Samples in association that were collected on the same day and estimated to have been deposited at the same time (based on the appearance of the sample) were considered to be individuals from the same social group [50].

In order to visualize the social organization of the individuals represented in our sample we used the package 'igraph' [51] in R [44]. We coded individual vertices for sex using shape and for mitochondrial haplotype using color. Additionally, we weighted the edges of our social networks using estimated genetic relatedness calculated using ML-Relate [52]. We excluded individuals that were found in isolation from the network. We visualized networks both with males and without males and report the number of vertices (individuals), edges (associations between individuals), and components (groups of vertices) for each network.

In order to examine whether or not relatedness was correlated with association, we used our association data and Queller and Goodnight [53] relatedness values calculated in GENALEX and ran Mantel tests in R [44] using the package 'vegan' [54].

## Results

### Sampling, individual identification, and sex

We visited 61 and 82 points in the dry and wet season, respectively, covering 84 of the 100 total points. We collected 300 total samples from 31 points. We calculated  $P(\text{ID})_{\text{sib}}$  to be  $< 0.001$  at 7 microsatellite loci. Given the high degree of sociality among forest elephants and need for more loci to distinguish among related individuals/genotypes, we excluded samples that could only be genotyped at fewer than 7 loci ( $N = 12$ ). Our analysis yielded 288 samples after exclusion, constituting 190 unique individuals. Some elephants were recaptured at the same location and time ( $N = 53$ ) so we excluded these 'false recaptures' for our abundance and density estimates but retained them for our sociality analyses. Recapture rates ranged

from one to four (Table 1) and all recaptures matched the capture in sex and haplotype when either could be determined.

### Genetic diversity, Hardy-Weinberg equilibrium, linkage disequilibrium, and null alleles

Genetic diversity measures from identified individuals are presented in Table 2 and S1 File contains allelic dropout estimates and false allele rates. Our results are consistent with previous studies using these markers in forest elephants inhabiting the Gamba Complex Industrial Corridor, with the presence of loci out of HWE, loci in LD, and null alleles explained by population structure and non-random mating [25, 31]. Exclusion of the markers that may have contained null alleles did not change our results, including population size estimates, so we included them in our downstream analyses.

### Estimation of abundance and density

Confidence intervals for estimated population abundance varied across three Capwire models (Table 3) from 432–683 (ECM) to a high of 754–1502 (TIRMPart) (Table 3). These models were significantly different in how well each was supported: the TIRM was better supported than the ECM (likelihood ratio = 43.52,  $P < 0.05$ ) and TIRMPart was better supported than the TIRM ( $P < 0.0001$ ).

### Sociality

Overall, we found similarity between our three sets of social networks of varying association radii (75, 100, and 250 m) in that a substantial proportion of networks in all analyses contained females with different mitochondrial haplotypes. Thus, we here present data on the 100 m social networks. See S3 File for results from the other networks. When including both sexes, the 100 m social networks consisted of 35 components, 166 edges, and 139 vertices (Fig 2A). The components ranged in size from 2 to 21 individuals. Excluding individuals of unknown sex, 11 components were composed of all females, 3 components were composed of all males, and 20 components consisted of both females and males. One component consisted of two individuals of unknown sex. We detected six mitochondrial haplotypes, all of which have been identified in previous studies [20, 55]. Twenty-two components had more than one female. Twelve of these components (54.5%) exhibited the same mitochondrial haplotype. When males and individuals of unknown sex were excluded from the analysis, the 100 m social network comprised 24 components, 58 edges, and 66 vertices that ranged in size from 2 to 5 individuals (Fig 2B). We could not confirm the presence of multiple haplotypes in 3 components due to individuals lacking haplotype data. Of the 21 components we were able to assess, 12 (57%) had the same mitochondrial haplotype. Our other social networks with different association radii (75 m and 250 m) also included components with females that had different mitochondrial haplotypes whether or not males were included (S3 File).

**Table 1. Capture rate of individual elephants.**

| Capture(s) (N) | Individuals (N) | Females/Males/Unknowns (N) |
|----------------|-----------------|----------------------------|
| 1              | 157             | 84/65/8                    |
| 2              | 25              | 12/10/3                    |
| 3              | 5               | 2/1/2                      |
| 4              | 2               | 0/2/0                      |
| 5              | 1               | 1/0/0                      |

<https://doi.org/10.1371/journal.pone.0231832.t001>

**Table 2. Genetic diversity measures per locus.**

| Marker    | Na     | Ne    | Ho    | He    | UHe   | Fis    | HWE     |
|-----------|--------|-------|-------|-------|-------|--------|---------|
| FH126     | 16     | 8.703 | 0.815 | 0.885 | 0.887 | 0.079  | NS      |
| FH48R     | 13     | 5.175 | 0.754 | 0.807 | 0.809 | 0.065  | < 0.05  |
| FH60R     | 12     | 7.071 | 0.858 | 0.859 | 0.861 | 0.001  | NS      |
| FH67      | 6      | 4.191 | 0.774 | 0.761 | 0.763 | -0.016 | NS      |
| FH94R     | 10     | 2.942 | 0.746 | 0.660 | 0.662 | -0.130 | NS      |
| LA4       | 12     | 7.037 | 0.695 | 0.858 | 0.860 | 0.189  | < 0.001 |
| LA5       | 8      | 4.388 | 0.684 | 0.772 | 0.774 | 0.114  | < 0.01  |
| LA6R      | 10     | 3.891 | 0.784 | 0.743 | 0.745 | -0.055 | NS      |
| Mean      | 10.875 | 5.425 | 0.764 | 0.793 | 0.795 | 0.031  |         |
| Std. Dev. | 3.09   | 1.97  | 0.06  | 0.07  | 0.07  | 0.10   |         |

Na, number of alleles; Ne, number of effective alleles; Ho, Observed heterozygosity; He, expected heterozygosity; UHe, unbiased expected heterozygosity;  $F_{IS}$ , Inbreeding coefficient; HWE, p-values for Hardy-Weinberg equilibrium test.

<https://doi.org/10.1371/journal.pone.0231832.t002>

Mean relatedness across all sampled individuals was  $-0.006 \pm 0.177$ . Among all dyads in all components in the 100 m social network, mean relatedness was  $0.184 \pm 0.021$ . When males and individuals of unknown sex were excluded, mean relatedness between all dyads in all components rose to  $0.246 \pm 0.033$ . Relatedness was significantly, positively correlated with being found in association within 100 m ( $r = 0.072$ , iterations = 999,  $p < 0.01$ ).

## Discussion

Our analyses produced different yet overlapping population size estimates using the different Capwire models. Concordant with other genetic capture-recapture studies [56], we found support for the TIRMPart model, which estimated that between 697 and 1,252 forest elephants inhabit our study area. This indicates that this population of forest elephants exhibits heterogeneity in capture probability. Differences in capture probability may reflect sex differences between males and females or may represent male movement in and out of the Industrial Corridor [31]. While our sampling period was relatively short (9 months) and similar to some sampling periods for other social mammals with slow life histories, such as great apes [57, 58], it is quite likely the population was not completely closed during this time period. In particular, individual elephant movement in and out of the study area may have reduced the likelihood of recapture, particularly because our sampling periods were in different seasons and at least some of the elephants in this population show seasonal movement [31]. Analyzing the

**Table 3. Forest elephant abundance and density estimates per km<sup>2</sup> in our study area.**

| Abundance Model (Capwire)                | Model Likelihood | Abundance 95% CI (Point Estimate) | Density 95% CI (Point Estimate) |
|------------------------------------------|------------------|-----------------------------------|---------------------------------|
| ECM                                      | -1131.598        | 432–683 (530)                     |                                 |
| TIRM                                     | -1088.083        | 604–1038 (690)                    |                                 |
| TIRMPart                                 | -935.884         | 754–1502 (867)                    |                                 |
| Density Model (SECR)                     |                  |                                   |                                 |
| Null                                     | -484.761         |                                   | 0.47–0.80 (0.62)                |
| Sex Differences in Detection Probability | -596.839         |                                   | 0.49–0.84 (0.64)                |

The null SECR model resulted in a population density of 0.62 elephants per km<sup>2</sup> (95% CI: 0.47–0.80) whereas our SECR model examining sex differences in detection probability indicated 0.64 elephants per km<sup>2</sup> (95% CI: 0.49–0.84). Based on AICc values, the null model better fit the data ( $\Delta AICc = 230.49$ ).

<https://doi.org/10.1371/journal.pone.0231832.t003>



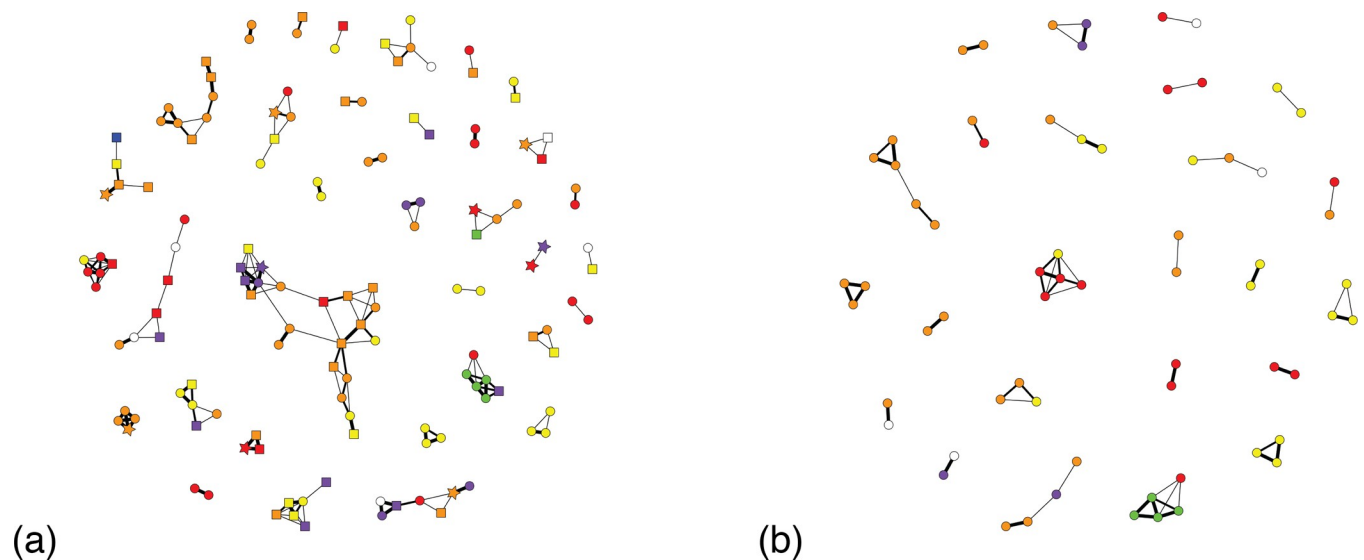

**Fig 2. Social networks.** The left network (2a) includes females (circles), males (squares), and individuals of unknown sex (stars) while the network on the right (2b) contains only females. Node color indicates mtDNA haplotype; white nodes are individuals whose mtDNA haplotype could not be determined. Edges are weighted by kinship estimated using ML-Relate with medium weighted lines representing second order relatives and the thickest lines representing first order relatives.

<https://doi.org/10.1371/journal.pone.0231832.g002>

two sampling sessions separately would also reduce likelihood of recapture, and recent studies have shown that longer sampling periods, despite increasing the likelihood of violating the closed population assumption, yield more precise and accurate population size estimates [56, 59]. Regardless, violation of the closed population assumption and reduction in recapture probability likely artificially inflates abundance and density estimates, so that our results may actually be optimistic.

The best fit SECR model produced density estimates of 0.47–0.80 elephants per km<sup>2</sup> that fall within the known range for forest elephants in Gabon: 0.18 elephants per km<sup>2</sup> at Monts Birougou National Park to 1.06 elephants per km<sup>2</sup> at Mwagné National Park [60]. There is some evidence that elephants in the Gamba Complex are attracted to roads and other human infrastructure (H. Vanthomme, personal observation), which would make these densities some of the highest for forest elephants in the Gamba Complex. If this type of heterogeneity is present, then spatially explicit methods may be the most appropriate, especially for social mammals [61].

If we extrapolate our results to the area of the entire Industrial Corridor (3,585 km<sup>2</sup>), we estimate that between 3,033 to 6,043 forest elephants inhabit this area based on abundance or between 1,684 to 2,832 elephants based on density. We note that extrapolation of these numbers assumes homogeneity in the factors that drive density across the landscape, which is unlikely. Since it is possible that human infrastructure may attract elephants, densities may be lower in other parts of the Industrial Corridor, which would make our extrapolated abundance estimates optimistic. Despite this variation, the extrapolated abundance estimates are still quite short of the estimate of 10,000 elephants in the Industrial Corridor [31]. This discrepancy may be explained by either differences in methodology and/or a recent decline in forest elephant population size in the Gamba Complex. Given the catastrophic population declines seen elsewhere in Gabon [10], this latter potential scenario is worrying. However, there is little evidence that elephant hunting and habitat loss in the Gamba Complex is at a rate that would cause such a rapid demographic decline. Still, new infrastructure as well as new mining and oil

concessions pose a significant threat and underscore the need to preserve this area, especially given its importance as one of the last remaining forest elephant strongholds [9].

We found that relatedness was consistent with our expectations from elephant social structure such that elephants found in association were more related than the mean relatedness across all individuals. Relatedness among associated females was also higher than the mean for all associated individuals. However, contrary to our prediction for forest elephant social structure based on previous studies and assumptions regarding the presence of strong female philopatry, we did not find a high proportion of social networks where females had the same mitochondrial haplotype. Approximately half of the networks exhibited females with only one mitochondrial haplotype, regardless of whether or not males and individuals of unknown sex were included in these networks (54.5% and 57%, respectively). Using a similar approach, a recent study examined social networks in forest elephants at Lopé [21] and found that 79% of social network components that had multiple females shared the same mitochondrial haplotype, which is more concordant with the female philopatric social structure typically found in savanna elephants. This suggests that the forest elephants living in the southern region of the Industrial Corridor may exhibit some degree of female dispersal, which is different to what has been assumed and found for other forest elephant populations as well as most African savanna elephants. A recent study found low but significant  $F_{ST}$  values in the mitochondrial DNA of these same animals [25], however, even modest levels of female dispersal could produce our observed pattern for social networks and relatedness.

We do not believe the observed departure from the expected pattern of strong female philopatry is an artifact of our methodology. As we excluded any samples that were differently aged, it is unlikely that we mistakenly assigned different matrilineages as being in association due to detection at the same location at different times. While it is possible that the associations between different matrilineages represent temporary fusion events between different social units around preferred food resources, the pervasiveness of associations between different mitochondrial haplotypes over the study area and period makes this explanation unlikely for the overall pattern. Thus, we believe that the lack of strong female philopatry in this population represents either 1) natural variation in social structure or 2) the effects of human activity (i.e., human hunting). For example, it is possible that forest elephants show conditional female dispersal as seen in other social mammals [62], causing a level of variation in societal kin structure that has previously gone underappreciated due to a limited number of studies. It is also possible that we are detecting anthropogenic effects such as poaching on forest elephant behavior and social structure. Poaching has been previously suggested to explain departures in expected social structure for savanna elephants in Mikumi National Park, Tanzania [63], Queen Elizabeth National Park, Uganda [64], and elsewhere [65]. As poaching disrupts social relationships between females, females left without a social group or smaller social groups may associate with other, unrelated females. Given the smaller size of forest elephant social units compared to savanna elephants [7, 20], the death of even one female may result in an individual female without a social group. It is possible that the presence of humans around Gamba may act as a refuge from poaching for elephants, thus resulting in the presence of multiple sedentary matrilineages in association with one another. However, further research is required to fully understand the anthropogenic and ecological variables that drive variation in forest elephant social structure.

## Conclusions

The present study provides novel baseline information on the forest elephants inhabiting the Gamba Complex. We believe the population size of forest elephants in the Gamba Complex

Industrial Corridor, and thus the Gamba Complex of Protected Areas as a whole, to be much smaller (~ 40–80% lower) than previously thought. While there are large confidence intervals around our estimates and there exist caveats surrounding our extrapolations, even our most optimistic results suggest a smaller population size than expected. This makes the future survival of forest elephants in general that much more precarious because the Gamba Complex is viewed as a forest elephant stronghold in Gabon, which in turn is seen as the stronghold for the global population of forest elephants. Further, we suggest that the female philopatric nature of forest elephants may be overstated in the current literature, and that forest elephants show a greater range of variation in social structure than previously thought. Lastly, given the difficulty in estimating forest elephant population sizes, we believe that this study demonstrates promise for continued use of genetic capture-recapture for forest elephant censusing. While other methods should still be used for comparison, expanding and repeating this study is essential to monitor changes in forest elephant population size and sociality.

It is clear that African forest elephants face significant threats from habitat loss, hunting and poaching, and other human related activities. Given the slow intrinsic growth rate of this particular taxon [60], continuous population decline will result in an increasingly difficult population recovery. It is imperative that known populations are monitored to provide accurate and precise data on the status of these populations and the global forest elephant population as a whole. While the population of elephants there may be smaller than previously expected, the Gamba Complex of Protected Areas remains a unique locality that can hopefully serve as a refuge for forest elephants in the short term, which will hopefully lead to long-term species survival.

## Supporting information

**S1 File. Allelic dropout and false allele rate per locus.**  
(PDF)

**S2 File. STR genotypes.**  
(XLSX)

**S3 File. Additional social networks.**  
(DOCX)

## Acknowledgments

We thank Rob Fleischer and Nancy McInerney for all their help and support for this project at the Center for Conservation Genomics at the National Zoological Park. Many thanks to our collaborators who contributed to field work: L. Tchignoumba, M. Onbenotori, G. R. Mihindou, A. Litona-Boubeya, and N. Simons. We also thank Murray Efford who graciously helped with the SECR analyses. This is contribution #192 of the Gabon Biodiversity Program.

## Author Contributions

**Conceptualization:** Colin M. Brand, Mireille B. Johnson, Jesús E. Maldonado, Lisa Korte, Hadrien Vanthomme, Alfonso Alonso, Nelson Ting.

**Data curation:** Mireille B. Johnson, Lillian D. Parker, Hadrien Vanthomme.

**Formal analysis:** Colin M. Brand, Lillian D. Parker, Maria Jose Ruiz-Lopez, Caitlin P. Wells.

**Funding acquisition:** Mireille B. Johnson, Jesús E. Maldonado, Lisa Korte, Hadrien Vanthomme, Alfonso Alonso, Nelson Ting.

**Investigation:** Mireille B. Johnson, Lillian D. Parker, Jesús E. Maldonado, Lisa Korte, Hadrien Vanthomme, Alfonso Alonso.

**Methodology:** Colin M. Brand, Mireille B. Johnson, Lillian D. Parker, Lisa Korte, Hadrien Vanthomme, Maria Jose Ruiz-Lopez, Caitlin P. Wells.

**Project administration:** Mireille B. Johnson, Jesús E. Maldonado, Lisa Korte, Nelson Ting.

**Resources:** Jesús E. Maldonado.

**Supervision:** Jesús E. Maldonado, Lisa Korte, Hadrien Vanthomme, Alfonso Alonso, Nelson Ting.

**Writing – original draft:** Colin M. Brand, Mireille B. Johnson, Nelson Ting.

**Writing – review & editing:** Colin M. Brand, Mireille B. Johnson, Lillian D. Parker, Jesús E. Maldonado, Lisa Korte, Hadrien Vanthomme, Alfonso Alonso, Maria Jose Ruiz-Lopez, Caitlin P. Wells, Nelson Ting.

## References

1. Roca AL, Georgiadis N, Pecon-Slattery J, O'Brien SJ. Genetic evidence for two species of elephant in Africa. *Science*. 2001; 293: 1473–1477. <https://doi.org/10.1126/science.1059936> PMID: 11520983
2. Fishlock V, Lee PC. Forest elephants: fission-fusion and social arenas. *Anim Behav*. 2013; 85: 357–363.
3. Querouil S, Magliocca F, Gautier-Hion A. Structure of population, grouping patterns and density of forest elephants in north-west Congo. *Afr J Ecol*. 1999; 37: 161–167.
4. Turkalo A, Fay M. Studying forest elephants by direct observation: preliminary results from the Dzanga clearing, Central African Republic. *Pachyderm*. 1995; 20: 45–54.
5. Morgan BJ, Lee PC. Forest elephant group composition, frugivory and coastal use in the Réserve de Faune du Petit Loango, Gabon. *Afr J Ecol*. 2007; 45: 519–526.
6. Mormont L. Selection de l'habitat et organisation sociale de l'éléphant de forêt, *Loxodonta africana cyclotis* (Matschie 1900), au Gabon. Ph.D. Thesis, Museum National d'Histoire Naturelle. 2007.
7. Schuttler SG, Whittaker A, Jeffery KJ, Eggert LS. African forest elephant social networks: fission-fusion dynamics, but fewer associations. *Endanger Species Res*. 2014b; 25: 165–173.
8. White LJT, Tutin CEG, Fernandez M. Group composition and diet of forest elephants, *Loxodonta africana cyclotis* Matschie 1900, in the Lopé Reserve, Gabon. *Afr J Ecol*. 1993; 31: 181–199.
9. Maisels F, Strindberg S, Blake S, Wittemyer G, Hart J, Williamson EA, et al. Devastating decline of forest elephants in Central Africa. *PLoS ONE*. 2013; 8: e59469. <https://doi.org/10.1371/journal.pone.0059469> PMID: 23469289
10. Poulsen JR, Koerner SE, Moore S, Medjibe VP, Blake S, Clark CJ, et al. Poaching empties critical Central African wilderness of forest elephants. *Curr Biol*. 2017; 27: R134–R135. <https://doi.org/10.1016/j.cub.2017.01.023> PMID: 28222286
11. Meyer M, Palkopoulou E, Baleka S, Stiller M, Penkman KEH, Alt KW, et al. Paleogenomes of Eurasian straight-tusked elephants challenge the current view of elephant evolution. *eLife*. 2017; 6: e25413. <https://doi.org/10.7554/eLife.25413> PMID: 28585920
12. Palkopoulou E, Lipson M, Mallick S, Nielsen S, Baleka S, Karpinski E, et al. A comprehensive genomic history of extinct and living elephants. *Proc Natl Acad Sci USA*. 2018; 115: E2566–E2574. <https://doi.org/10.1073/pnas.1720554115> PMID: 29483247
13. Short JC. Diet and feeding behaviour of the forest elephant. *Mammalia*. 1981; 45: 177–185.
14. Tchamba MN, Seme PM. Diet and feeding behaviour of the forest elephant in the Sanchou Reserve, Cameroon. *Afr J Ecol*. 1993; 31: 165–171.
15. Archie EA, Moss CJ, Alberts SC. The ties that bind: genetic relatedness predicts the fission and fusion of social groups in wild African elephants. *Proc R Soc Lond B Biol Sci*. 2006; 273: 513–522.
16. Douglas-Hamilton I. On the ecology and behaviour of the African elephant. Oxford: Oxford University Press; 1972.
17. Moss CJ, Poole JH. Relationships and social structure of African elephants. In: Hinde RA editor. *Primate social relationships: an integrated approach*. Oxford: Blackwell Scientific; 1983. pp. 315–325.

18. Wittemyer G, Douglas-Hamilton I, Getz W. The socioecology of elephants: analysis of the processes creating multitiered social structures. *Anim Behav.* 2005; 69: 1357–1371.
19. Turkalo AK, Wrege PH, Wittemyer G. Long-term monitoring of Dzanga Bai forest elephants: forest clearing use patterns. *PLoS ONE.* 2013; 8: e85154. <https://doi.org/10.1371/journal.pone.0085154> PMID: 24386460
20. Munshi-South J. Relatedness and demography of African forest elephants: Inferences from noninvasive fecal DNA analyses. *J Hered.* 2011; 102: 391–398. <https://doi.org/10.1093/jhered/esr030> PMID: 21576286
21. Schuttler SG, Philbrick JA, Jeffery KJ, Eggert LS. Fine-scale genetic structure and cryptic associations reveal evidence of kin-based sociality in the African forest elephant. *PloS ONE.* 2014a; 9: e88074.
22. Fishlock V, Lee PC, Breuer T. Quantifying forest elephant social structure in Central African bai environments. *Pachyderm.* 2008; 44: 17–26.
23. Ahlering MA, Maldonado JE, Fleischer RC, Western D, Eggert LS. Fine-scale group structure and demography of African savanna elephants recolonizing lands outside protected areas. *Divers Distrib.* 2012; 18: 952–961.
24. Ahlering MA, Maldonado JE, Eggert LS, Fleischer RC, Western D, Brown JL. Conservation outside protected areas and the effect of human-dominated landscapes on stress hormones in savanna elephants. *Conservation Biology.* 2013; 27: 569–575. <https://doi.org/10.1111/cobi.12061> PMID: 23692020
25. Johnson MB, Parker LD, Vanthomme H, Tchignoumba L, Deichmann JL, Maldonado JE, et al. Patterns of genetic diversity in African forest elephants living in a human-modified landscape in southwest Gabon. *Conser Sci Prac.* 2019; e76. <https://doi.org/10.1111/csp2.76>
26. Blake S, Strindberg S, Boudjan P, Makombo C, Bila-Isia I, Ilambu O, et al. Forest elephant crisis in the Congo Basin. *PLoS Biol.* 2007; 5: e111. <https://doi.org/10.1371/journal.pbio.0050111> PMID: 17407383
27. Arrendal J, Vila C, Bjorklund M. Reliability of noninvasive genetic census of otters compared to field censuses. *Conserv Genet.* 2007; 8: 1097–1107.
28. Guschanski K, Vigilant L, McNeilage A, Gray M, Kagoda E, Robbins MM. Counting elusive animals: comparing field and genetic census of the entire mountain gorilla population of Bwindi impenetrable National Park, Uganda. *Biol Conserv.* 2009; 142: 290–300.
29. Blanc JJ, Barnes RFW, Craig GC, Dublin HT, Thouless CR, Douglass-Hamilton I, et al. African elephant status report 2007: an update from the African Elephant Database. *Gland (Switzerland): IUCN;* 2007.
30. Thibault M, Walsh PD, Idiata D, Mbina C, Mihindou Y, White LJT. Inventaire de Grands mammifères dans le Complexe d'Aires Protégées de Gamba en 1998 et 1999. Preliminary report. *World Wildlife Fund and Wildlife Conservation Society, Libreville, Gabon;* 2001.
31. Eggert LS, Buij R, Lee ME, Campbell P, Dallmeier F, Fleischer RC, et al. Using genetic profiles of African forest elephants to infer population structure, movements, and habitat use in a conservation and development landscape in Gabon. *Conserv Biol.* 2014; 28: 107–118. <https://doi.org/10.1111/cobi.12161> PMID: 24471781
32. Munshi-South J, Tchignoumba L, Brown J, Abbondanza N, Maldonado JE, Henderson A, et al. Physiological indicators of stress in African forest elephants (*Loxodonta africana cyclotis*) in relation to petroleum operations in Gabon, Central Africa. *Divers Distrib.* 2008; 14: 993–1001.
33. Alonso A, Dallmeier F, Korte L, Vanthomme H. The Gabon Biodiversity Program: A conservation research collaboration. *Afr Today.* 2014; 61: 3–15. <https://doi.org/10.2979/africatoday.61.1.3>
34. Vanthomme H, Kolowski J, Korte L, Alonso A. Distribution of a community of mammals in relation to roads and other human disturbances in Gabon, central Africa. *Conserv Biol.* 2013; 27: 281–291. <https://doi.org/10.1111/cobi.12017> PMID: 23410077
35. Ahlering MA, Hailer F, Roberts MT, Foley C. A simple and accurate method to sex savanna, forest and Asian elephants using noninvasive sampling techniques. *Mol Ecol Resour.* 2011; 11: 831–834. <https://doi.org/10.1111/j.1755-0998.2011.03030.x> PMID: 21635697
36. Fernando P, Pfrender ME, Encalada SE, Lande R. Mitochondrial DNA variation, phylogeography and population structure of the Asian elephant. *Heredity.* 2000; 84: 362–372. <https://doi.org/10.1046/j.1365-2540.2000.00674.x> PMID: 10762406
37. Peakall R, Smouse PE. GenAIEx 6.5: genetic analysis in Excel. Population genetic software for teaching and research—an update. *Bioinformatics.* 2012; 28: 2537–2539. <https://doi.org/10.1093/bioinformatics/bts460> PMID: 22820204
38. Waits LP, Luikart G, Taberlat P. Estimating the probability of identity among genotypes in natural populations: cautions and guidelines. *Mol Ecol.* 2001; 10: 249–256. <https://doi.org/10.1046/j.1365-294x.2001.01185.x> PMID: 11251803
39. Raymond M, Rousset F. GENEPOP (version 1.2): population genetics software for exact tests and ecumenicism. *J Hered.* 1995; 86: 248–249.



40. Van Oosterhout C, Hutchinson WF, Wills DP, Shipley P. MICRO-CHECKER: software for identifying and correcting genotyping errors in microsatellite data. *Mol Ecol Resour.* 2004; 4: 535–538.
41. Valière N. GIMLET: a computer program for analysing genetic individual identification data. *Mol Ecol Notes.* 2002; 2: 377–379.
42. Miller CR, Joyce P, Waits LP. A new method for estimating the size of small populations from genetic mark-recapture data. *Mol Ecol.* 2005; 14: 1991–2005. <https://doi.org/10.1111/j.1365-294X.2005.02577.x> PMID: 15910321
43. Pennell MW, Stansbury CR, Waits LP, Miller CR. Capwire: a R package for estimating population census size from non-invasive genetic sampling. *Mol Ecol Resour.* 2013; 13: 154–157. <https://doi.org/10.1111/1755-0998.12019> PMID: 22995036
44. R Core Team. R: A language and environment for statistical computing. R Foundation for Statistical Computing, Vienna, Austria; 2018. <https://www.R-project.org/>
45. Arandjelovic M, Vigilant L. Non-invasive genetic censusing and monitoring of primate populations. *Am J Primatol.* 2018; e22743. <https://doi.org/10.1002/ajp.22743> PMID: 29457631
46. Borchers DL, Efford MG. Spatially explicit maximum likelihood methods for capture-recapture studies. *Biometrics.* 2008; 64: 377–385. <https://doi.org/10.1111/j.1541-0420.2007.00927.x> PMID: 17970815
47. Efford MG. Estimation of population density by spatially explicit capture-recapture analysis of data from area searches. *Ecology.* 2011; 92: 2202–2207. <https://doi.org/10.1890/11-0332.1> PMID: 22352159
48. Kolowski JM, Blake S, Kock MD, Lee ME, Henderson A, Honorez A, et al. Movements of four forest elephants in an oil concession in Gabon, Central Africa. *Afr J Ecol.* 2010; 48: 1134–1138.
49. Burnham KP, Anderson DR. Model selection and multimodel inference: A practical information-theoretic approach. 2nd ed. New York: Springer; 2002.
50. Brand CM, White FJ, Wakefield ML, Waller MT, Ruiz-Lopez MJ, Ting N. 2016. Initiation of genetic demographic monitoring of bonobos (*Pan paniscus*) at Iyema, Lomako Forest, DRC. *Prim Conserv.* 30: 103–111.
51. Csardi G, Nepusz T. The igraph software package for complex network research. *InterJournal, Complex Systems.* 2006; 1695: 1–9.
52. Kalinowski ST, Wagner AP, Taper ML. ML-Relate: a computer program for maximum likelihood estimation of relatedness and relationship. *Mol Ecol Notes.* 2006; 6: 576–579.
53. Queller DC, Goodnight KF. 1989. Estimating relatedness using genetic markers. *Evolution.* 1989; 43: 258–275. <https://doi.org/10.1111/j.1558-5646.1989.tb04226.x> PMID: 28568555
54. Oksanen J, Guillaume Blanchet F, Friendly M, Kindt R, Legendre P, McGlenn D, et al. vegan: Community Ecology Package. R package version 2.5–4; 2006. <https://CRAN.R-project.org/package=vegan>
55. Johnson MB, Clifford SL, Goossens B, Nyakaana S, Curran B, White LJT, et al. Complex phylogeographic history of central African forest elephants and its implications for taxonomy. *BMC Evol Biol.* 2007; 7: 244. <https://doi.org/10.1186/1471-2148-7-244> PMID: 18093290
56. Granjon AC, Rowney C, Vigilant L, Langergraber KE. Evaluating genetic capture-recapture using a chimpanzee population of known size. *J Wildl Manage.* 2017; 81: 279–288.
57. McCarthy MS, Lester JD, Howe EJ, Arandjelovic M, Stanford CB, Vigilant L. Genetic censusing identifies an unexpectedly sizeable population of an endangered large mammal in a fragmented forest landscape. *BMC Ecol.* 2015; 15: 21. <https://doi.org/10.1186/s12898-015-0052-x> PMID: 26303656
58. Moore DL, Vigilant L. A population estimate of chimpanzee (*Pan troglodytes schweinfurthii*) in the Ugalla region using standard and spatially explicit genetic capture-recapture methods. *Am J Primatol.* 2014; 76: 335–346. <https://doi.org/10.1002/ajp.22237> PMID: 24357255
59. Arandjelovic M, Head J, Kuehl H, Boesch C, Robbins MM, Maisels F, et al. Effective non-invasive genetic monitoring of multiple wild western lowland gorilla groups. *Biol Conserv.* 2010; 143: 1780–1791.
60. Turkalo AK, Wrege PH, Wittemyer G. Slow intrinsic growth rate in forest elephants indicates recovery from poaching will require decades. *J Appl Ecol.* 2016; 54: 153–159.
61. Goswami VR, Yadava MK, Vasudev D, Prasad PK, Sharma P, Jathanna D. Towards a reliable assessment of Asian elephant population parameters: the application of photographic spatial capture-recapture sampling in a priority floodplain ecosystem. *Sci Rep.* 2019; 9: 8578. <https://doi.org/10.1038/s41598-019-44795-y> PMID: 31189980
62. Wikberg EC, Sicotte P, Campos FA, Ting N. Between-group variation in female dispersal, kin composition of groups, and proximity patterns in a black-and-white colobus monkey (*Colobus vellerosus*). *PLOS One.* 2012; 7: e48740. <https://doi.org/10.1371/journal.pone.0048740> PMID: 23144951
63. Gobush K, Kerr B, Wasser S. 2009. Genetic relatedness and disrupted social structure in a poach population of African elephants. *Mol Ecol.* 2009; 18: 722–734. <https://doi.org/10.1111/j.1365-294X.2008.04043.x> PMID: 19175507

64. Nyakaana S, Abe EL, Arctander P, Siegismund HR. DNA evidence for elephant social behaviour breakdown in Queen Elizabeth National Park, Uganda. *Anim Conserv*. 2001; 4: 231–237.
65. Archie EA, Chiyo PI. Elephant behaviour and conservation: social relationships, the effects of poaching, and genetic tools for management. *Mol Ecol*. 2012; 21: 765–778. <https://doi.org/10.1111/j.1365-294X.2011.05237.x> PMID: 21880086
